# Supplementary material for: Charge-transport anisotropy in black phosphorus: critical dependence on the number of layers
Source: Royal Society of Chemistry journal article supplement (doi:10.1039/c6cp02129h), 2016-01-01
Supplement: c6cp02129h1.pdf [file c6cp02129h1.pdf]

# *Supporting Information*

## **Charge-Transport Anisotropy in Black Phosphorus: Critical dependence on the number of layers**

Swastika Banerjee<sup>a</sup> and Swapan K. Pati<sup>\*a, b</sup>

---

<sup>a</sup>.<sup>†</sup>New Chemistry Unit, <sup>‡</sup>Theoretical Sciences Unit

<sup>b</sup>. Jawaharlal Nehru Center for Advanced Scientific Research

<sup>c</sup>. Jakkur P. O., Bangalore 560064, India

<sup>d</sup>. \*E-mail: [swapan.jnc@gmail.com](mailto:swapan.jnc@gmail.com)

**Computational details:** We have carried out a SCF calculation with  $70 \times 70 \times 1$  k-mesh giving rise to a finer k vs. E (k) spectrum. This can capture the Dirac like state at the vicinity of  $\Gamma$ -point which remains intractable even after using a considerable k-grid of  $20 \times 20 \times 1$  through HSE06 functional. So, we have shown the band-dispersion pattern along the  $\Gamma$ -X band line (see Fig. 2d) with PBE functional after consideration of  $70 \times 70 \times 1$ . We have included this discussion in the supporting information file. We also have mentioned that Fig. 1d is obtained with PBE functional with dense grid.

#### Supplementary Figures and Table:

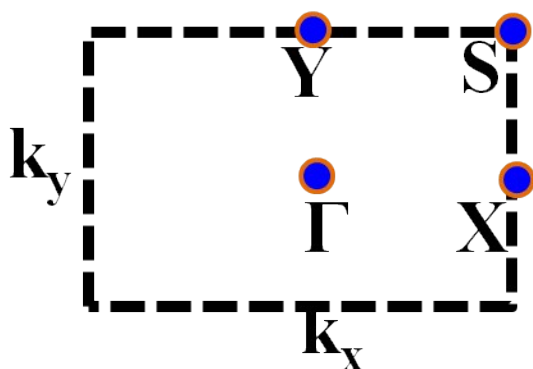

Figure S1. Wigner-Seitz cell with high symmetry k-points is shown for optimized structure of TBP ( $\alpha$ -P, ABA stacking) as shown in Figure 1a.

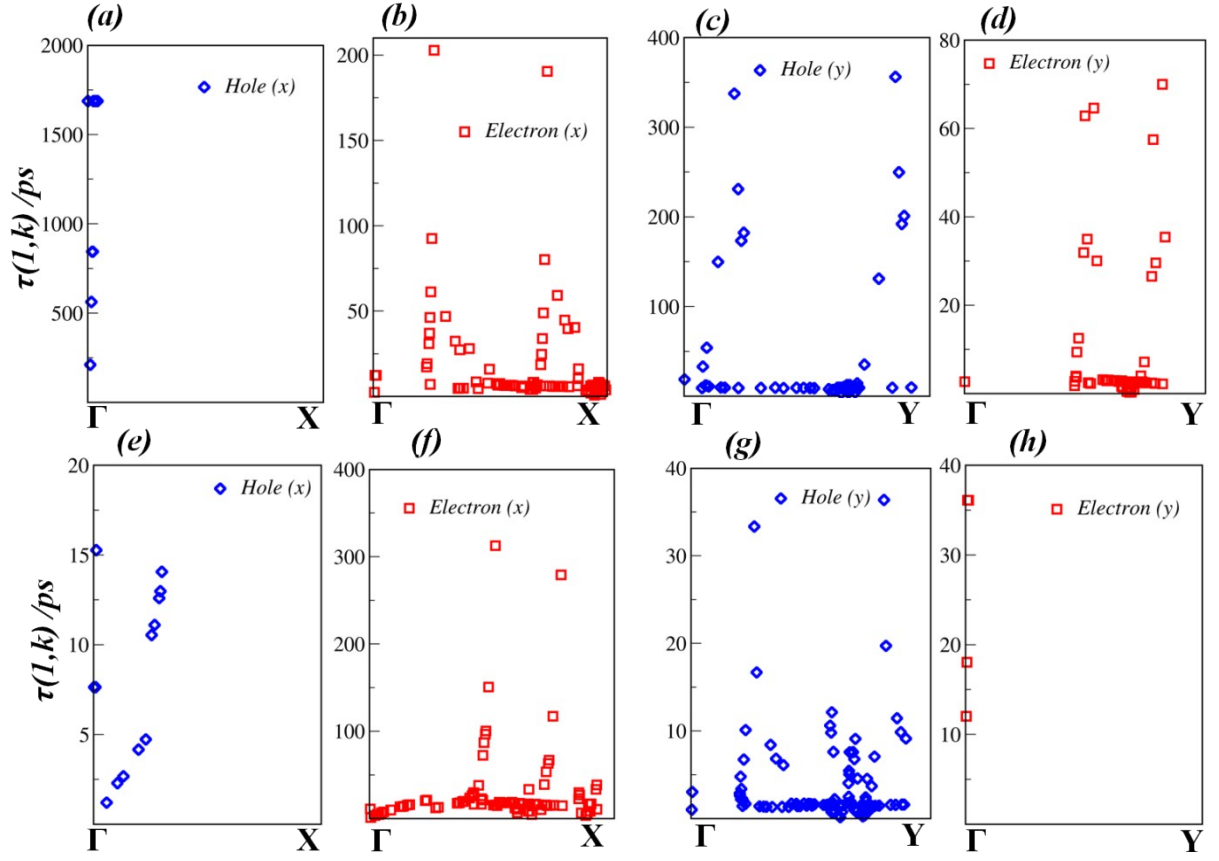

**Fig. S2.** (a), (b), (c) and (b) represent the plot of relaxation time (as in eq. 2) vs. corresponding carrier-states (in k-space) along different transport direction and carriers for monolayer. (e), (f), (g) and (h) are the same for bulk (black) phosphorous.

Table T1. Carrier types (P), where, e(h)<sub>x/y</sub> denote electron(hole) transport direction along x/y. Mobilities ( $\mu_{\text{effective}}$ ) for monolayer have been calculated using equation (1) at T = 300 K.

| P              | $\mu_{\text{effective}}$ ( $10^3 \text{ cm}^2\text{V}^{-1}\text{s}^{-1}$ ) |
|----------------|----------------------------------------------------------------------------|
| e <sub>x</sub> | 0.28                                                                       |
| e <sub>y</sub> | 0.014                                                                      |
| h <sub>x</sub> | 0.57                                                                       |
| h <sub>y</sub> | 12.49                                                                      |
